# Supplementary material
Source: publisher site journal article supplement (https://www.spandidos-publications.com/4494/downloadSupplementary)
Supplement: Supplementary file 1 [file downloadSupplementary]

## Sheet: 工作表 1 - String_interactions
Table SII. Protein-protein interactions of ferroptosis markers.
Gene1	Gene 2	combined_score
CHAC1	GPX4	0.929
FTH1	SLC40A1	0.779
FTH1	NFE2L2	0.447
FTH1	GPX4	0.497
FTH1	TFRC	0.989
GPX4	FTH1	0.497
GPX4	PTGS2	0.48
GPX4	NFE2L2	0.7
GPX4	CHAC1	0.929
NFE2L2	FTH1	0.447
NFE2L2	GPX4	0.7
NFE2L2	PTGS2	0.611
PTGS2	GPX4	0.48
PTGS2	NFE2L2	0.611
SLC40A1	FTH1	0.779
SLC40A1	TFRC	0.82
TF	TFRC	0.999
TFRC	SLC40A1	0.82
TFRC	FTH1	0.989
TFRC	TF	0.999
